# Supplementary material for: Comprehensive cancer-gene panels can be used to estimate mutational load and predict clinical benefit to PD-1 blockade in clinical practice
Source: PubMed Central journal article supplement (PMC4741447; doi:10.18632/oncotarget.5950), 2015-10-01
Supplement: oncotarget-06-34221-s001.pdf [file oncotarget-06-34221-s001.pdf]

# Comprehensive cancer-gene panels can be used to estimate mutational load and predict clinical benefit to PD-1 blockade in clinical practice

## Supplementary Material

### Table of contents

|                                                                             |               |
|-----------------------------------------------------------------------------|---------------|
| <b>Table S1.</b> FM-CGP Genes                                               | <b>pg. 2</b>  |
| <b>Table S2.</b> HSL-CGP Genes                                              | <b>pg. 3</b>  |
| <b>Table S3.</b> NSCLC Data – FM-CGP                                        | <b>pg. 5</b>  |
| <b>Table S4.</b> NSCLC Data – HSL-CGP                                       | <b>pg. 6</b>  |
| <b>Table S5.</b> Melanoma Data – FM-CGP                                     | <b>pg. 7</b>  |
| <b>Table S6.</b> Melanoma Data – HSL-CGP                                    | <b>pg. 8</b>  |
| <b>Table S7.</b> CGP-mutational load x clinical response to CTLA-4 blockade | <b>pg. 9</b>  |
| <b>Table S8.</b> NSCLC Data – Cancer SelectR 88-CGP                         | <b>pg. 10</b> |
| <b>Table S9.</b> NSCLC Data – Cancer SelectR 203-CGP                        | <b>pg. 11</b> |
| <b>Table S10.</b> NSCLC Data – Qiagen-CGP                                   | <b>pg. 12</b> |
| <b>Figure S1.</b> Clinical benefit prediction by smaller CGPs               | <b>pg. 13</b> |

**Table S1. FM-CGP genes.**

| GeneSymbol – FM-CGP |        |        |          |          |        |          |         |          |
|---------------------|--------|--------|----------|----------|--------|----------|---------|----------|
| ABL1                | BRIP1  | CTCF   | FGF10    | GSK3B    | KRAS   | NOTCH2   | PTCH1   | SOX2     |
| ABL2                | BTG1   | CTNNA1 | FGF14    | H3F3A    | LMO1   | NOTCH3   | PTEN    | SOX9     |
| ACVR1B              | BTK    | CTNNA1 | FGF19    | HGF      | LRP1B  | NPM1     | PTPN11  | SPEN     |
| AKT1                | EMSY   | CUL3   | FGF23    | HNF1A    | LYN    | NRAS     | QKI     | SPOP     |
| AKT2                | CARD11 | CYLD   | FGF3     | HRAS     | LZTR1  | NSD1     | RAC1    | SPTA1    |
| AKT3                | CBFB   | DAXX   | FGF4     | HSD3B1   | MAGI2  | NTRK1    | RAD50   | SRC      |
| ALK                 | CBL    | DDR2   | FGF6     | HSP90AA1 | MAP2K1 | NTRK2    | RAD51   | STAG2    |
| APC                 | CCND1  | DICER1 | FGFR1    | IDH1     | MAP2K2 | NTRK3    | RAF1    | STAT3    |
| AR                  | CCND2  | DNMT3A | FGFR2    | IDH2     | MAP2K4 | NUP93    | RANBP2  | STAT4    |
| ARAF                | CCND3  | DOT1L  | FGFR3    | IGF1R    | MAP3K1 | PAK3     | RARA    | STK11    |
| ARFRP1              | CCNE1  | EGFR   | FGFR4    | IGF2     | MCL1   | PALB2    | RB1     | SUFU     |
| ARID1A              | CD274  | EP300  | FH       | IKBKE    | MDM2   | PARK2    | RBM10   | SYK      |
| ARID1B              | CD79A  | EPHA3  | FLCN     | IKZF1    | MDM4   | PAX5     | RET     | TAF1     |
| ARID2               | CD79B  | EPHA5  | FLT1     | IL7R     | MED12  | PBRM1    | RICTOR  | TBX3     |
| ASXL1               | CDC73  | EPHA7  | FLT3     | INHBA    | MEF2B  | PDCD1LG2 | RNF43   | TERC     |
| ATM                 | CDH1   | EPHB1  | FLT4     | INPP4B   | MEN1   | PDGFRA   | ROS1    | TERT     |
| ATR                 | CDK12  | ERBB2  | FOXL2    | IRF2     | MET    | PDGFRB   | RPTOR   | TET2     |
| ATRX                | CDK4   | ERBB3  | FOXP1    | IRF4     | MITF   | PK1      | RUNX1   | TGFB2    |
| AURKA               | CDK6   | ERBB4  | FRS2     | IRS2     | MLH1   | PIK3C2B  | RUNX1T1 | TNFAIP3  |
| AURKB               | CDK8   | ERG    | FUBP1    | JAK1     | MPL    | PIK3CA   | SDHA    | TNFRSF14 |
| AXIN1               | CDKN1A | ERRFI1 | GABRA6   | JAK2     | MRE11A | PIK3CB   | SDHB    | TOP1     |
| AXL                 | CDKN1B | ESR1   | GATA1    | JAK3     | MSH2   | PIK3CG   | SDHC    | TOP2A    |
| BAP1                | CDKN2A | EZH2   | GATA2    | JUN      | MSH6   | PIK3R1   | SDHD    | TP53     |
| BARD1               | CDKN2B | AMER1  | GATA3    | KAT6A    | MTOR   | PIK3R2   | SETD2   | TSC1     |
| BCL2                | CDKN2C | FAM46C | GATA4    | KDM5A    | MUTYH  | PLCG2    | SF3B1   | TSC2     |
| BCL2L1              | CEBPA  | FANCA  | GATA6    | KDM5C    | MYC    | PMS2     | SLIT2   | TSHR     |
| BCL2L2              | CHD2   | FANCC  | c17orf39 | KDM6A    | MYCL   | POLD1    | SMAD2   | U2AF1    |
| BCL6                | CHD4   | FANCD2 | GLI1     | KDR      | MYCN   | POLE     | SMAD3   | VEGFA    |
| BCOR                | CHEK1  | FANCE  | GNA11    | KEAP1    | MYD88  | PPP2R1A  | SMAD4   | VHL      |
| BCORL1              | CHEK2  | FANCF  | GNA13    | KEL      | NF1    | PRDM1    | SMARCA4 | WISP3    |
| BLM                 | CIC    | FANCG  | GNAQ     | KIT      | NF2    | PREX2    | SMARCB1 | WT1      |
| BRAF                | CREBBP | FANCL  | GNAS     | KLHL6    | NFE2L2 | PRKAR1A  | SMO     | XPO1     |
| BRCA1               | CRKL   | FAS    | GPR124   | KMT2A    | NFKBIA | PRKCI    | SNCAIP  | ZBTB2    |
| BRCA2               | CRLF2  | FAT1   | GRIN2A   | KMT2C    | NKX2-1 | PRKDC    | SOCS1   | ZNF217   |
| BRD4                | CSF1R  | FBXW7  | GRM3     | KMT2D    | NOTCH1 | PRSS8    | SOX10   | ZNF703   |

**Table S2. HSL-CGP genes.**

| GeneSymbol – HSL-CGP |        |          |         |         |         |        |          |          |
|----------------------|--------|----------|---------|---------|---------|--------|----------|----------|
| AARS2                | ARID1A | BRIP1    | CDKN2A  | CUL3    | ERG     | FH     | GOT2     | INHBA    |
| ABCB1                | ARID1B | BTG1     | CDKN2B  | CUL4B   | ERRFI1  | FIGF   | GPHN     | INPP4B   |
| ABCC1                | ARID2  | BTK      | CDKN2C  | CUX1    | ESR1    | FKBP9  | GPR124   | INPPL1   |
| ABL1                 | ARID5B | BUB1B    | CEBPA   | CYLD    | EWSR1   | FLCN   | GPS2     | INTS12   |
| ABL2                 | ASPM   | C11orf30 | CEP76   | DAXX    | EZH1    | FLG    | GRIN2A   | IPO7     |
| ACO1                 | ASXL1  | C3orf70  | CFH     | DDR2    | EZH2    | FLT1   | GRM3     | IRF2     |
| ACVR1B               | ASXL2  | CAD      | CHD2    | DDX3X   | EZR     | FLT3   | GSK3B    | IRF4     |
| ACVR2B               | ATG13  | CAP2     | CHD4    | DDX5    | FAM123B | FLT4   | GTF2H1   | IRF6     |
| ADAM10               | ATM    | CARD11   | CHD8    | DHX9    | FAM166A | FN1    | GUSB     | IRS2     |
| ADCY1                | ATP5B  | CARM1    | CHEK1   | DIAPH1  | FAM46C  | FOXA1  | H3F3A    | ITGA6    |
| ADNP                 | ATR    | CASP8    | CHEK2   | DICER1  | FANCA   | FOXA2  | H3F3C    | ITGB7    |
| ADORA2A              | ATRX   | CAST     | CIC     | DIS3    | FANCC   | FOXL2  | HDAC4    | ITPKB    |
| AHNAK2               | AURKA  | CBFB     | CLIP1   | DMD     | FANCD2  | FOXP1  | HGF      | JAK1     |
| AJUBA                | AURKB  | CBL      | CLTC    | DNAH12  | FANCE   | FOXQ1  | HIST1H1E | JAK2     |
| AKAP9                | AXIN1  | CCAR1    | CLTCL1  | DNER    | FANCF   | FRG1B  | HIST1H3B | JAK3     |
| AKD1                 | AXIN2  | CCDC120  | CNBD1   | DNMT1   | FANCG   | FRMD7  | HIST1H4E | JUN      |
| AKT1                 | AXL    | CCDC6    | CNKSRL1 | DNMT3A  | FANCL   | FRS2   | HLA-A    | KALRN    |
| AKT2                 | AZGP1  | CCND1    | COL18A1 | DOCK2   | FAS     | FUBP1  | HLA-B    | KAT6A    |
| AKT3                 | B2M    | CCND2    | COL5A1  | DOT1L   | FAT1    | GABRA6 | HMGXB4   | KDM5A    |
| ALK                  | BAP1   | CCND3    | COL5A3  | EEF1A1  | FBN2    | GATA1  | HNF1A    | KDM5C    |
| ALKBH6               | BARD1  | CCNE1    | CREB1   | EGFR    | FBXO11  | GATA2  | HRAS     | KDM6A    |
| ALPK2                | BCL2   | CD1D     | CREBBP  | EIF2S2  | FBXW7   | GATA3  | HSD3B1   | KDR      |
| AMPH                 | BCL2L1 | CD274    | CRKL    | EIF4A2  | FES     | GATA4  | HSP90AA1 | KEAP1    |
| ANAPC1               | BCL2L2 | CD70     | CRLF2   | ELF3    | FGF10   | GATA6  | HSP90B1  | KEL      |
| ANK3                 | BCL6   | CD79A    | CRTC1   | EP300   | FGF14   | GID4   | HSPA8    | KIAA1109 |
| ANKRD12              | BCLAF1 | CD79B    | CRTC3   | EPHA2   | FGF19   | GLI1   | HUWE1    | KIFC3    |
| APAF1                | BCOR   | CDC27    | CSDE1   | EPHA3   | FGF23   | GNA11  | IDH1     | KIT      |
| APC                  | BCORL1 | CDC73    | CSF1R   | EPHA5   | FGF3    | GNA13  | IDH2     | KLF4     |
| APOL2                | BHMT2  | CDH1     | CTCF    | EPHA7   | FGF4    | GNAI1  | IGF1R    | KLHL6    |
| AR                   | BLM    | CDK12    | CTNNA1  | EPHB1   | FGF6    | GNAQ   | IGF2     | KLHL8    |
| ARAF                 | BRAF   | CDK4     | CTNNB1  | ERBB2   | FGFBP1  | GNAS   | IGF2R    | KRAS     |
| ARFRP1               | BRCA1  | CDK6     | CTNND1  | ERBB2IP | FGFR1   | GNB1   | IKBKE    | LCP1     |
| ARHGAP32             | BRCA2  | CDK8     | CTSL1   | ERBB3   | FGFR2   | GNPTAB | IKZF1    | LCTL     |
| ARHGAP35             | BRD4   | CDKN1A   | CTTN    | ERBB4   | FGFR3   | GOLGA5 | IL7R     | LEPR     |
| ARHGEF6              | BRE    | CDKN1B   | CUL1    | ERCC2   | FGFR4   | GOT1   | ING1     | LIFR     |

**GeneSymbol – HSL-CGP (cont.)**

|          |        |         |          |         |           |         |           |           |
|----------|--------|---------|----------|---------|-----------|---------|-----------|-----------|
| LMO1     | MITF   | NEB     | PAPD5    | PPP2R1A | RNF43     | SMARCB1 | TCP11L2   | U2AF1     |
| LPP      | MLH1   | NEDD4L  | PARK2    | PPP6C   | ROS1      | SMC1A   | TDRD10    | UHRF1BP1L |
| LRP1B    | MLL    | NF1     | PARP1    | PRDM1   | RPGR      | SMC3    | TERC      | VEGFA     |
| LRRK2    | MLL2   | NF2     | PARP4    | PREX2   | RPL22     | SMO     | TERT      | VHL       |
| LUM      | MLL3   | NFE2L2  | PAX5     | PRKAR1A | RPL5      | SNCAIP  | TET2      | WASF3     |
| LYN      | MLL4   | NFKBIA  | PBRM1    | PRKCD   | RPS15     | SNX25   | TFDP1     | WHSC1     |
| LZTR1    | MLLT10 | NIN     | PCBP1    | PRKCE   | RPS2      | SOCS1   | TGFBR2    | WHSC1L1   |
| MAGI2    | MLLT3  | NKX2-1  | PCM1     | PRKCI   | RPSAP58   | SOS1    | TGIF1     | WISP3     |
| MALAT1   | MLLT4  | NLRP3   | PDAP1    | PRKDC   | RPTOR     | SOX10   | TIMM17A   | WRN       |
| MAP2K1   | MMP2   | NONO    | PDCD1LG2 | PRPF8   | RSBN1L    | SOX17   | TJP2      | WT1       |
| MAP2K2   | MN1    | NOS1    | PDCD2L   | PRSS8   | RUNX1     | SOX2    | TNF       | XIRP2     |
| MAP2K4   | MORC4  | NOTCH1  | PDGFRA   | PSEN1   | RUNX1T1   | SOX9    | TNFAIP3   | XPO1      |
| MAP3K1   | MPL    | NOTCH2  | PDGFRB   | PTCH1   | RXRA      | SPATA6  | TNFRSF10C | ZBTB2     |
| MAP3K3   | MPO    | NOTCH3  | PDK1     | PTEN    | SACS      | SPEN    | TNFRSF14  | ZFHX3     |
| MAP3K4   | MRE11A | NPM1    | PDSS2    | PTGS2   | SDHA      | SPOP    | TNKS      | ZFP36L1   |
| MAP4K3   | MSH2   | NR1H2   | PHF6     | PTPN11  | SDHB      | SPTA1   | TOM1      | ZFP36L2   |
| MAPK8IP1 | MSH6   | NR4A2   | PHLDA1   | PTPRC   | SDHC      | SRC     | TOP1      | ZMYM2     |
| MAST2    | MSN    | NRAS    | PIK3C2A  | QKI     | SDHD      | SRSF2   | TOP2A     | ZNF132    |
| MATK     | MST1   | NSD1    | PIK3C2B  | RAB40A  | SELP      | STAG2   | TOP3A     | ZNF180    |
| MAX      | MTOR   | NTN3    | PIK3CA   | RAC1    | SEPT12    | STAT3   | TP53      | ZNF217    |
| MBD1     | MUC17  | NTN4    | PIK3CB   | RAD21   | SERPINB13 | STAT4   | TP53BP1   | ZNF300    |
| MCL1     | MUTYH  | NTRK1   | PIK3CG   | RAD50   | SETD2     | STK11   | TPR       | ZNF471    |
| MDC1     | MXRA5  | NTRK2   | PIK3R1   | RAD51   | SETDB1    | STK19   | TPX2      | ZNF483    |
| MDM2     | MYB    | NTRK3   | PIK3R2   | RAF1    | SF3B1     | STX2    | TRAF3     | ZNF620    |
| MDM4     | MYC    | NUMA1   | PIK3R5   | RANBP2  | SFRS2     | SUFU    | TRAF7     | ZNF703    |
| MECOM    | MYCL   | NUP210L | PIP5K1A  | RANBP3  | SGK1      | SUZ12   | TRIM23    | ZNF750    |
| MED12    | MYCN   | NUP214  | PLCG1    | RARA    | SIN3A     | SYK     | TRIM7     | ZNF814    |
| MED13    | MYD88  | NUP93   | PLCG2    | RASA1   | SIRT4     | SYNE1   | TRIO      | ZNF844    |
| MED17    | MYH9   | NUP98   | PLEC     | RB1     | SLC1A3    | TAF1    | TRIP11    | ZNF91     |
| MED23    | MYOCD  | ODAM    | PMS2     | RBM10   | SLC26A3   | TAP1    | TRRAP     | ZRANB3    |
| MEF2A    | NAV3   | OMA1    | POLD1    | RBMX    | SLC44A3   | TBC1D12 | TSC1      |           |
| MEF2B    | NBPF1  | OR4A16  | POLE     | RET     | SLC4A5    | TBL1XR1 | TSC2      |           |
| MEN1     | NBPF10 | OR52N1  | POLR3A   | RHEB    | SLIT2     | TBX3    | TSHR      |           |
| MET      | NCOA3  | OTUD7A  | POTEF    | RHOA    | SMAD2     | TCEB1   | TTLL9     |           |
| METTLL14 | NCOA4  | PABPC1  | POU2AF1  | RICTOR  | SMAD3     | TCF12   | TUBA1A    |           |
| MGA      | NCOR1  | PAK3    | POU2F2   | RIT1    | SMAD4     | TCF7    | TXNDC8    |           |
| MICALCL  | NCOR2  | PALB2   | PPM1D    | RNF213  | SMARCA4   | TCF7L2  | TXNIP     |           |

**Table S3. NSCLC Data (Rizvi et al. 2014) – FM-CGP.**

| <b>Durable Clinical Benefit (DCB)</b> |                       | <b>No Durable Benefit (NDB)</b> |                       |
|---------------------------------------|-----------------------|---------------------------------|-----------------------|
| <b>Patient_ID</b>                     | <b>Mutation_Count</b> | <b>Patient_ID</b>               | <b>Mutation_Count</b> |
| SA9755                                | 32                    | TU0428                          | 20                    |
| HE3202                                | 29                    | ZA6505                          | 19                    |
| Y2087                                 | 14                    | MA7027                          | 9                     |
| RI1933                                | 23                    | JB112852                        | 6                     |
| M4945                                 | 22                    | SR070761                        | 5                     |
| CA9903                                | 11                    | GR4788                          | 5                     |
| KA3947                                | 5                     | BL3403                          | 5                     |
| SC0899                                | 7                     | DM123062                        | 4                     |
| AL4602                                | 7                     | WA7899                          | 9                     |
| DI6359                                | 8                     | R7495                           | 2                     |
| RH090935                              | 10                    | LO3793                          | 9                     |
| SB010944                              | 2                     | RO3338                          | 5                     |
| SC6470                                | 7                     | LO5004                          | 4                     |
| GR0134                                | 1                     | NI9507                          | 4                     |
|                                       |                       | AU5884                          | 2                     |
|                                       |                       | VA1330                          | 3                     |
|                                       |                       | VA7859                          | 0                     |

**Table S4. NSCLC Data (Rizvi et al. 2014) – HSL-CGP.**

| <b>Durable Clinical Benefit (DCB)</b> |                       | <b>No Durable Benefit (NDB)</b> |                       |
|---------------------------------------|-----------------------|---------------------------------|-----------------------|
| <b>Patient_ID</b>                     | <b>Mutation_Count</b> | <b>Patient_ID</b>               | <b>Mutation_Count</b> |
| SA9755                                | 81                    | TU0428                          | 41                    |
| HE3202                                | 60                    | ZA6505                          | 26                    |
| Y2087                                 | 20                    | MA7027                          | 22                    |
| RI1933                                | 28                    | JB112852                        | 10                    |
| M4945                                 | 35                    | SR070761                        | 8                     |
| CA9903                                | 19                    | GR4788                          | 11                    |
| KA3947                                | 13                    | BL3403                          | 6                     |
| SC0899                                | 26                    | DM123062                        | 5                     |
| AL4602                                | 13                    | WA7899                          | 15                    |
| DI6359                                | 18                    | R7495                           | 7                     |
| RH090935                              | 13                    | LO3793                          | 13                    |
| SB010944                              | 8                     | RO3338                          | 7                     |
| SC6470                                | 10                    | LO5004                          | 8                     |
| GR0134                                | 3                     | NI9507                          | 4                     |
|                                       |                       | AU5884                          | 4                     |
|                                       |                       | VA1330                          | 4                     |
|                                       |                       | VA7859                          | 2                     |

**Table S5. Melanoma Data (Snyder et al. 2014) – FM-CGP.**

| <b>Durable Clinical Benefit (DCB)</b> |                       | <b>No Durable Benefit (NDB)</b> |                       |
|---------------------------------------|-----------------------|---------------------------------|-----------------------|
| <b>Patient_ID</b>                     | <b>Mutation_Count</b> | <b>Patient_ID</b>               | <b>Mutation_Count</b> |
| CR1509                                | 8                     | SD2051                          | 3                     |
| CR9306                                | 32                    | SD5038                          | 10                    |
| CR0095                                | 9                     | SD5934                          | 4                     |
| CR4880                                | 20                    | SD5118                          | 1                     |
| CR7623                                | 5                     | SD6494                          | 10                    |
| CR3665                                | 5                     | SD7357                          | 30                    |
| CR9699                                | 25                    | NR3156                          | 0                     |
| SD0346                                | 13                    | NR5784                          | 0                     |
| SD6336                                | 5                     | NR8727                          | 0                     |
| SD1494                                | 27                    | NR4949                          | 9                     |
| SD2056                                | 3                     | NR1867                          | 2                     |
| CR04885                               | 41                    | NR3549                          | 12                    |
| CR06670                               | 4                     | NR9341                          | 0                     |
| CR22640                               | 3                     | NR4810                          | 8                     |
| CR6126                                | 9                     | NR2137                          | 17                    |
| CR6161                                | 21                    | NR4018                          | 2                     |
| CRNR0244                              | 6                     | NR4045                          | 14                    |
| CRNR2472                              | 0                     | NR4083                          | 6                     |
| CRNR4941                              | 1                     | NR4631                          | 20                    |
| LSD0167                               | 4                     | NR6689                          | 0                     |
| LSD2057                               | 1                     | NR6721                          | 3                     |
| LSD3484                               | 14                    | NR6842                          | 0                     |
| LSD4691                               | 0                     | NR8815                          | 37                    |
| LSD4744                               | 33                    | NR9445                          | 6                     |
| LSD6819                               | 6                     | NR9449                          | 12                    |
| LSDNR1120                             | 7                     | NR9521                          | 28                    |
| LSDNR1650                             | 2                     | NR9765                          | 2                     |
| LSDNR3086                             | 2                     |                                 |                       |
| LSDNR9298                             | 7                     |                                 |                       |
| NR9705                                | 4                     |                                 |                       |
| PR03803                               | 1                     |                                 |                       |
| PR11217                               | 0                     |                                 |                       |
| PR4035                                | 11                    |                                 |                       |
| PR4046                                | 6                     |                                 |                       |
| PR4077                                | 34                    |                                 |                       |
| PR4091                                | 7                     |                                 |                       |
| PR4092                                | 28                    |                                 |                       |

**Table S6. Melanoma Data (Snyder et al. 2014) – HSL-CGP.**

| <b>Durable Clinical Benefit (DCB)</b> |                       | <b>No Durable Benefit (NDB)</b> |                       |
|---------------------------------------|-----------------------|---------------------------------|-----------------------|
| <b>Patient_ID</b>                     | <b>Mutation_Count</b> | <b>Patient_ID</b>               | <b>Mutation_Count</b> |
| CR1509                                | 17                    | SD2051                          | 4                     |
| CR9306                                | 74                    | SD5038                          | 15                    |
| CR0095                                | 13                    | SD5934                          | 8                     |
| CR4880                                | 29                    | SD5118                          | 2                     |
| CR7623                                | 9                     | SD6494                          | 32                    |
| CR3665                                | 8                     | SD7357                          | 52                    |
| CR9699                                | 57                    | NR3156                          | 0                     |
| SD0346                                | 25                    | NR5784                          | 0                     |
| SD6336                                | 9                     | NR8727                          | 0                     |
| SD1494                                | 59                    | NR4949                          | 23                    |
| SD2056                                | 6                     | NR1867                          | 2                     |
| CR04885                               | 93                    | NR3549                          | 24                    |
| CR06670                               | 19                    | NR9341                          | 1                     |
| CR22640                               | 9                     | NR4810                          | 16                    |
| CR6126                                | 24                    | NR2137                          | 31                    |
| CR6161                                | 44                    | NR4018                          | 9                     |
| CRNR0244                              | 15                    | NR4045                          | 19                    |
| CRNR2472                              | 3                     | NR4083                          | 8                     |
| CRNR4941                              | 3                     | NR4631                          | 49                    |
| LSD0167                               | 10                    | NR6689                          | 0                     |
| LSD2057                               | 2                     | NR6721                          | 6                     |
| LSD3484                               | 28                    | NR6842                          | 0                     |
| LSD4691                               | 0                     | NR8815                          | 81                    |
| LSD4744                               | 63                    | NR9445                          | 16                    |
| LSD6819                               | 16                    | NR9449                          | 17                    |
| LSDNR1120                             | 15                    | NR9521                          | 56                    |
| LSDNR1650                             | 2                     | NR9765                          | 3                     |
| LSDNR3086                             | 2                     |                                 |                       |
| LSDNR9298                             | 22                    |                                 |                       |
| NR9705                                | 31                    |                                 |                       |
| PR03803                               | 1                     |                                 |                       |
| PR11217                               | 0                     |                                 |                       |
| PR4035                                | 28                    |                                 |                       |
| PR4046                                | 9                     |                                 |                       |
| PR4077                                | 82                    |                                 |                       |
| PR4091                                | 12                    |                                 |                       |
| PR4092                                | 55                    |                                 |                       |



**Table S7. CGP-mutational load is not associated with clinical benefit to CTLA-4 blockade in melanoma patients.**

| Cancer-Gene Panel | CGP Mutational Load | Cutoff              | n  | Median mutations/sample (interquartile range) | Number of DCB patients n (%) | Fisher's Exact <i>P</i> | Median OS (Years) | Log-Rank <i>P</i> | HR for PFS (95% CI)    |
|-------------------|---------------------|---------------------|----|-----------------------------------------------|------------------------------|-------------------------|-------------------|-------------------|------------------------|
| <b>FM Panel</b>   | High load           | <b>6</b> mutations  | 35 | 12 (8-27)                                     | 21 (60)                      | 0.8                     | 2.9               | 0.76              | 1.105 (0.578 to 2.111) |
|                   | Low load            |                     | 29 | 2 (0-3.5)                                     | 16 (55.2)                    |                         | 2.6               |                   |                        |
| <b>HSL Panel</b>  | High load           | <b>14</b> mutations | 32 | 28 (17.5-56)                                  | 19 (59.4)                    | 1.00                    | 2.9               | 0.81              | 1.080 (0.567 to 2.055) |
|                   | Low load            |                     | 32 | 3 (1-9)                                       | 18 (56.2)                    |                         | 2.1               |                   |                        |

**Table S8. NSCLC Data (Rizvi et al. 2014) – Cancer SelectR 88-CGP.**

| <b>Durable Clinical Benefit (DCB)</b> |                       | <b>No Durable Benefit (NDB)</b> |                       |
|---------------------------------------|-----------------------|---------------------------------|-----------------------|
| <b>Patient_ID</b>                     | <b>Mutation_Count</b> | <b>Patient_ID</b>               | <b>Mutation_Count</b> |
| SA9755                                | 7                     | TU0428                          | 9                     |
| HE3202                                | 11                    | ZA6505                          | 6                     |
| Y2087                                 | 4                     | MA7027                          | 0                     |
| RI1933                                | 4                     | JB112852                        | 2                     |
| M4945                                 | 5                     | SR070761                        | 1                     |
| CA9903                                | 7                     | GR4788                          | 3                     |
| KA3947                                | 2                     | BL3403                          | 1                     |
| SC0899                                | 5                     | DM123062                        | 2                     |
| AL4602                                | 4                     | WA7899                          | 0                     |
| DI6359                                | 2                     | R7495                           | 2                     |
| RH090935                              | 3                     | LO3793                          | 5                     |
| SB010944                              | 1                     | RO3338                          | 3                     |
| SC6470                                | 2                     | LO5004                          | 2                     |
| GR0134                                | 1                     | NI9507                          | 3                     |
|                                       |                       | AU5884                          | 2                     |
|                                       |                       | VA1330                          | 2                     |
|                                       |                       | VA7859                          | 0                     |

**Table S9. NSCLC Data (Rizvi et al. 2014) – Cancer SelectR 203-CGP.**

| <b>Durable Clinical Benefit (DCB)</b> |                       | <b>No Durable Benefit (NDB)</b> |                       |
|---------------------------------------|-----------------------|---------------------------------|-----------------------|
| <b>Patient_ID</b>                     | <b>Mutation_Count</b> | <b>Patient_ID</b>               | <b>Mutation_Count</b> |
| SA9755                                | 20                    | TU0428                          | 14                    |
| HE3202                                | 18                    | ZA6505                          | 12                    |
| Y2087                                 | 7                     | MA7027                          | 2                     |
| RI1933                                | 13                    | JB112852                        | 3                     |
| M4945                                 | 13                    | SR070761                        | 5                     |
| CA9903                                | 7                     | GR4788                          | 4                     |
| KA3947                                | 2                     | BL3403                          | 4                     |
| SC0899                                | 9                     | DM123062                        | 4                     |
| AL4602                                | 5                     | WA7899                          | 2                     |
| DI6359                                | 2                     | R7495                           | 2                     |
| RH090935                              | 5                     | LO3793                          | 7                     |
| SB010944                              | 1                     | RO3338                          | 5                     |
| SC6470                                | 3                     | LO5004                          | 2                     |
| GR0134                                | 1                     | NI9507                          | 3                     |
|                                       |                       | AU5884                          | 2                     |
|                                       |                       | VA1330                          | 2                     |
|                                       |                       | VA7859                          | 0                     |

**Table S10. NSCLC Data (Rizvi et al. 2014) – Qiagen-CGP.**

| <b>Durable Clinical Benefit (DCB)</b> |                       | <b>No Durable Benefit (NDB)</b> |                       |
|---------------------------------------|-----------------------|---------------------------------|-----------------------|
| <b>Patient_ID</b>                     | <b>Mutation_Count</b> | <b>Patient_ID</b>               | <b>Mutation_Count</b> |
| SA9755                                | 17                    | TU0428                          | 14                    |
| HE3202                                | 17                    | ZA6505                          | 12                    |
| Y2087                                 | 7                     | MA7027                          | 4                     |
| RI1933                                | 7                     | JB112852                        | 3                     |
| M4945                                 | 12                    | SR070761                        | 5                     |
| CA9903                                | 7                     | GR4788                          | 3                     |
| KA3947                                | 4                     | BL3403                          | 3                     |
| SC0899                                | 6                     | DM123062                        | 2                     |
| AL4602                                | 6                     | WA7899                          | 3                     |
| DI6359                                | 2                     | R7495                           | 2                     |
| RH090935                              | 6                     | LO3793                          | 7                     |
| SB010944                              | 1                     | RO3338                          | 5                     |
| SC6470                                | 4                     | LO5004                          | 2                     |
| GR0134                                | 0                     | NI9507                          | 3                     |
|                                       |                       | AU5884                          | 2                     |
|                                       |                       | VA1330                          | 1                     |
|                                       |                       | VA7859                          | 0                     |

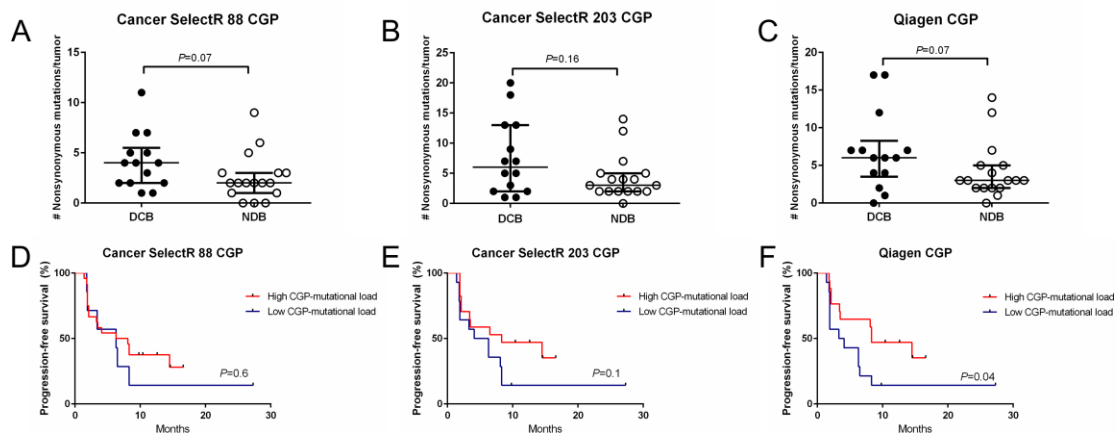

**Figure S1. Smaller CGPs are not as accurate to determine clinical benefit of anti-PD-1 therapy in NSCLCs. (A)** Cancer SelectR 88-CGP (76 cancer-genes, from PGDx) mutational load in patients with DCB (n=14) compared to those with NDB (n=17) (median 4 versus 2, Mann-Whitney  $P=0.07$ ). **(B)** Cancer SelectR 203-CGP (195 cancer-genes, from PGDx) mutational load in in patients with DCB (n=14) compared to those with NDB (n=17) (median 6 versus 3, Mann-Whitney  $P=0.16$ ). **(C)** Human Comprehensive Cancer GeneRead Targeted CGP (with 160 cancer-genes, from Qiagen) mutational load in patients with DCB (n=14) compared to those with NDB (n=17) (median 6 versus 3, Mann-Whitney  $P=0.07$ ). **(D)** PFS in tumors with high CGP-mutational load compared to those with low CGP mutational load (Cutoff $\geq 2$ ) in Cancer SelectR 88-CGP (HR 0.71, 95% CI 0.25-2.04, Log-rank  $P=0.5$ ). **(E)** PFS in tumors with high CGP-mutational load compared to those with low CGP mutational load (Cutoff $\geq 4$ ) in Cancer SelectR 203-CGP (HR 0.47, 95% CI 0.19-1.15, Log-rank  $P=0.1$ ). **(F)** PFS in tumors with high CGP-mutational load compared to those with low CGP mutational load (Cutoff $\geq 4$ ) in Qiagen-CGP (HR 0.39, 95% CI 0.15-0.98, Log-rank  $P=0.04$ ).
